# Supplementary material for: Experimental development of a lake spray source function and its model implementation for Great Lakes surface emissions
Source: Copernicus journal article supplement (doi:10.5194/acp-2022-158), 2022-03-14
Supplement: Supplementary file 1 [file acp-2022-158-supplement-version2.pdf]

*Supplement of*

# **Experimental development of a lake spray source function and its model implementation for Great Lakes surface emissions**

Charbel Harb <sup>1</sup> and Hosein Foroutan <sup>1</sup>

<sup>1</sup>Department of Civil and Environmental Engineering, Virginia Tech, Blacksburg, VA, 24060

**Correspondence:** Hosein Foroutan (hosein@vt.edu)

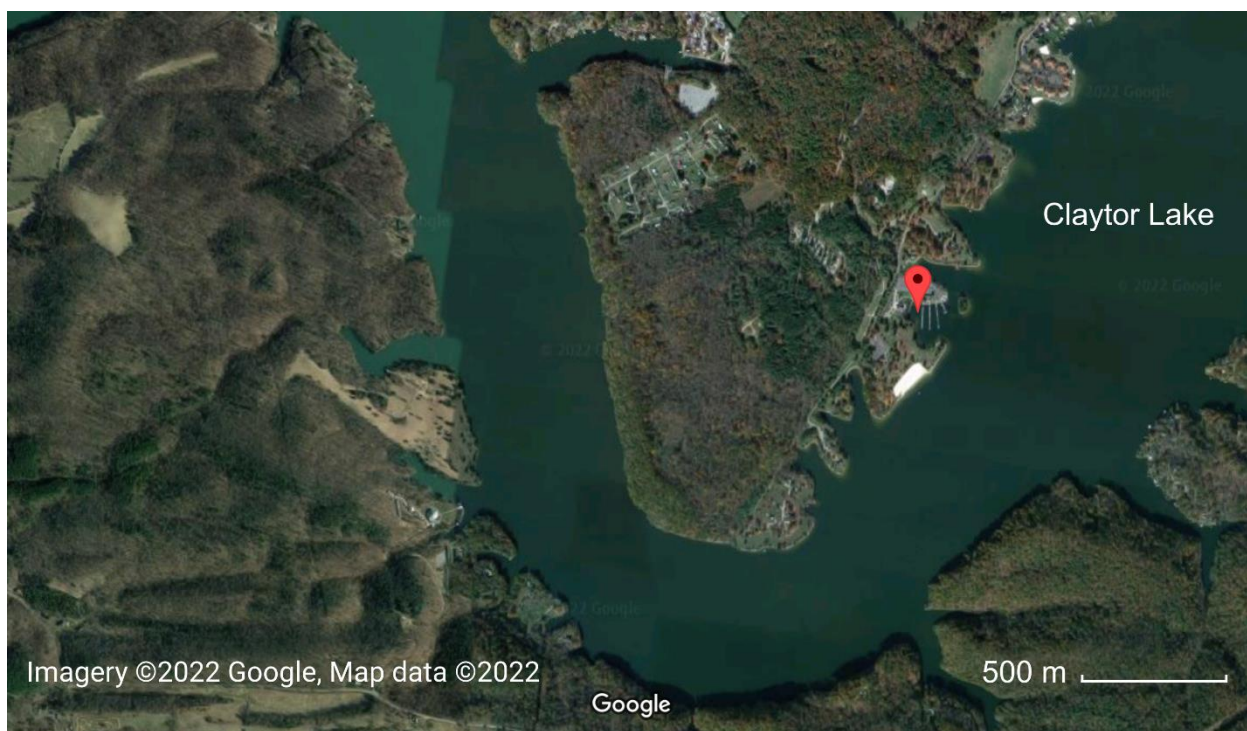

**Figure S1** Sampling location in Claytor Lake.

**Table S1** Claytor Lake water samples metadata: collection date and time, water salinity, and water temperature at collection.

| Water sample           | Collection date and time        | Water salinity at collection* (ppt) | Water temperature at collection* (°C) |
|------------------------|---------------------------------|-------------------------------------|---------------------------------------|
| Claytor Lake (October) | 31 October 2020, 10:00-10:30 LT | 0.05                                | 14.4                                  |
| Claytor Lake (August)  | 9 August 2021, 10:00-10:30 LT   | 0.05                                | 26.8                                  |

\* As measured by an Extech EC170 salinity-temperature meter.

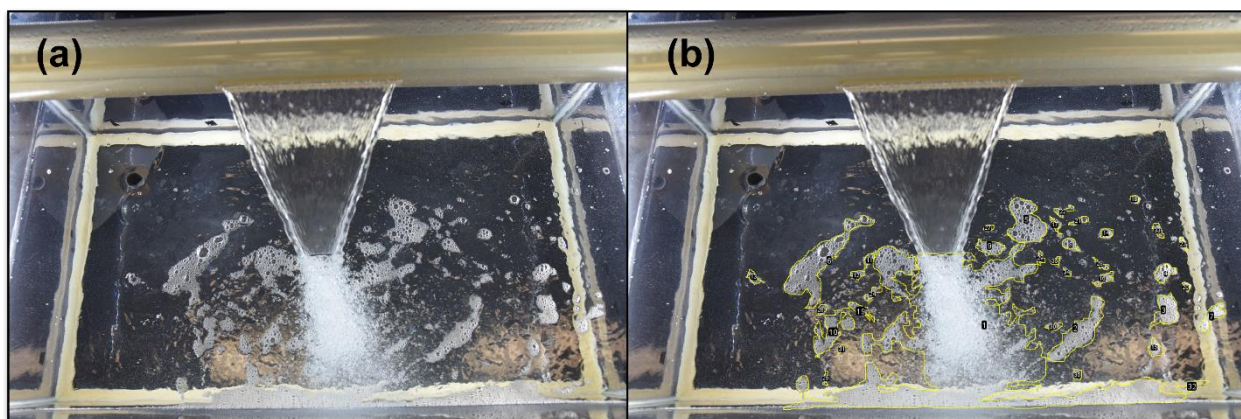

**Figure S2** (a) Surface foam generated by the MART using synthetic saltwater and (b) the corresponding outlined area produced manually using the ImageJ software.

**Table S2** Summary of the water and air properties in each experiment conducted in the MART.

| Water sample                         | Water temperature at the start/end of the experiment* (°C) | Water salinity at the start/end of the experiment* (ppt) | Air temperature** (°C) | Air RH** (%) |
|--------------------------------------|------------------------------------------------------------|----------------------------------------------------------|------------------------|--------------|
| Synthetic freshwater (with dryer)    | 21.5/27.1                                                  | 0.09/0.10                                                | 22.3                   | 33           |
| Synthetic freshwater (without dryer) | 22.4/29.4                                                  | 0.08/0.08                                                | 23.9                   | 94           |
| Synthetic saltwater (with dryer)     | 23.1/31.2                                                  | 27.7/27.9                                                | 23.5                   | 36           |
| Synthetic saltwater (without dryer)  | 21.4/28.0                                                  | 28.3/27.5                                                | 24.1                   | 94           |
| Claytor Lake (October)               | 19.5/27.7                                                  | 0.09/0.10                                                | 23.3                   | 90           |
| Claytor Lake (August)                | 26.0/30.1                                                  | 0.05/0.05                                                | 24.1                   | 91           |

\* As measured by an Extech EC170 salinity-temperature meter.

\*\* As measured by a HOBO UX100-011 temperature-RH data logger.

### S1 Wall loss coefficient ( $k$ ) determination

To determine the wall loss coefficient  $k$  inside the MART, we arrest water flow ( $E = 0$ ) and measure the decay of aerosol number concentration (Quadros and Marr, 2011; Lin and Marr, 2017). During this decay phase, the mass balance (Eq. (6)) reads:

$$\frac{dC_{out}}{dt} = -a C_{out} \quad (S1)$$

In Eq. (S1), the coefficient  $a$  is:

$$a = k + \frac{Q_{in}}{V} \quad (S2)$$

Hence, Eq. (S2) can be rearranged to obtain the wall loss coefficient  $k$  as follows:

$$k = a - \frac{Q_{in}}{V} \quad (S3)$$

The coefficient  $a$  in Eq. (S3) was determined by plotting the natural logarithm of the number concentration inside the MART ( $\ln C_{out}$ ) versus time ( $t$ ) during the decay phase for submicron (Fig. S3a) and supermicron particles (Fig. S3b). In these plots,  $a$  is the slope of the linear fit to the data.

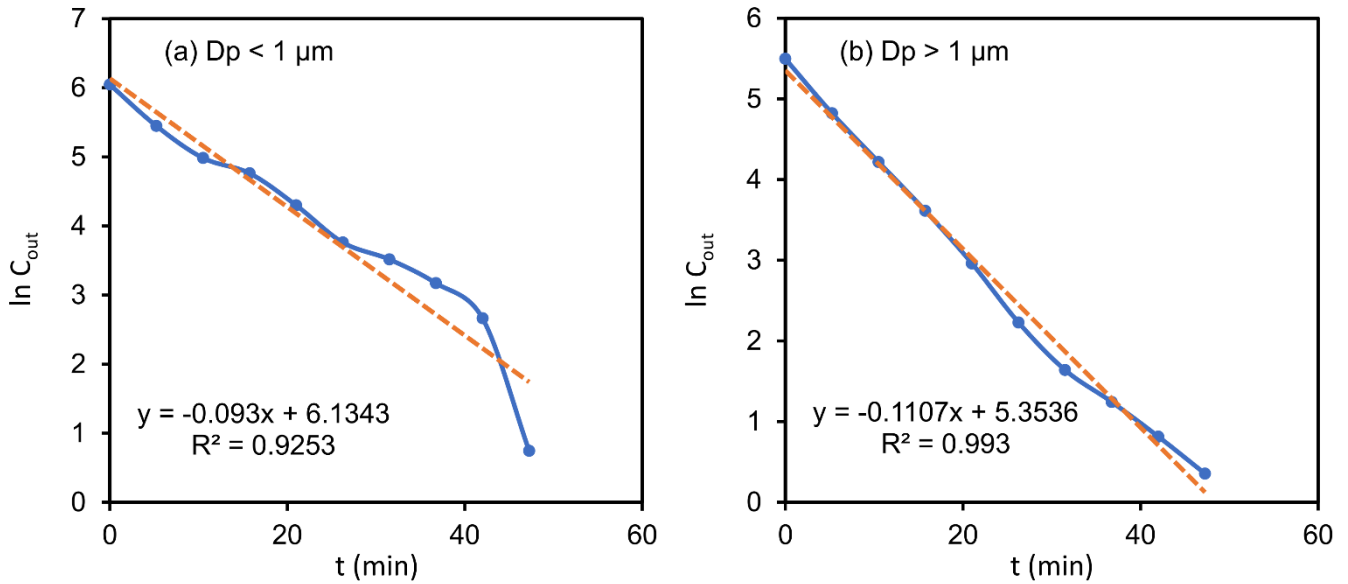

**Figure S3** The decay of  $\ln C_{out}$  versus time  $t$  in the synthetic saltwater experiment (wet) for (a) submicron and (b) supermicron aerosols inside the MART. Also shown are the linear fits to the data for each size range.

## S2 Estimate of particle losses in the TSI 3062 diffusion dryer

We follow the procedure proposed by Von Der Weiden et al. (2009) to estimate tubing losses in a simplified model of the TSI 3062 diffusion dryer consisting of a straight dryer tube with a length  $L$  equal to 53.5 cm and an inner diameter  $d$  equal to 12.7 mm, and two 90°-elbows on each side each having an inner diameter  $d$  equal to 12.7 mm and a length  $L$  equal to 6 cm (Fig. S4a). The air flow rate in the dryer  $Q$  is set to  $1.3 \text{ Lmin}^{-1}$ , which is the combined sampling flow rate of the SMPS and APS. The estimated particle losses versus particle diameter are shown in Fig. S4b. Particles were assumed to have a density of  $1500 \text{ kgm}^{-3}$  and to be spherical with a shape factor equal to 1.

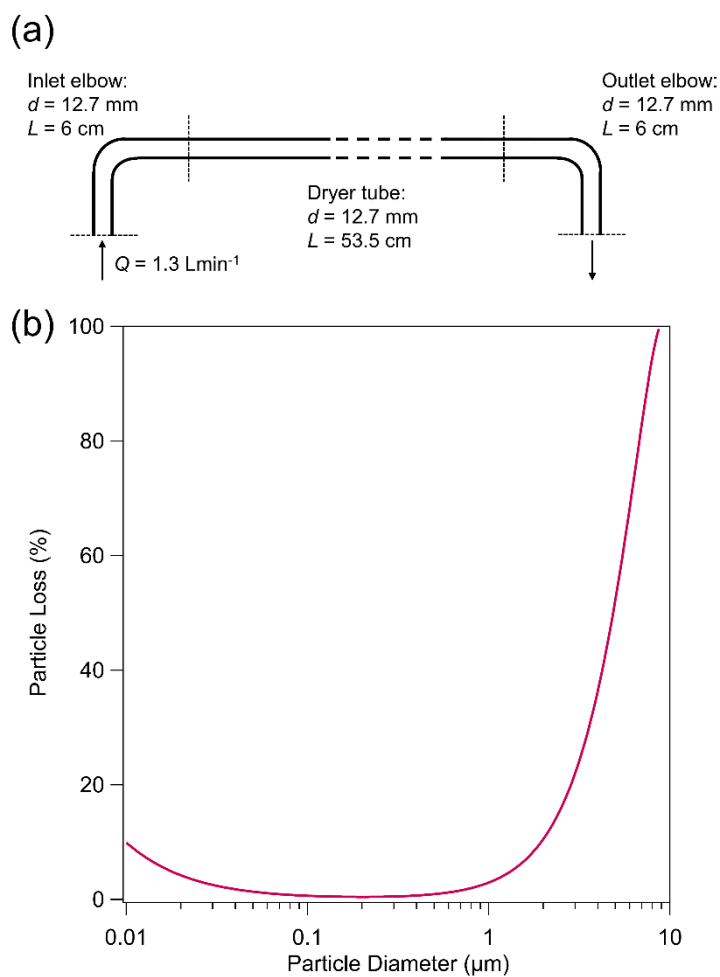

**Figure S4** (a) A simplified tubing configuration of the TSI 3062 diffusion dryer and (b) the corresponding particle loss in the dryer calculated using the procedure in Von Der Weiden et al. (2009).

## References

Lin, K. and Marr, L. C.: Aerosolization of Ebola virus surrogates in wastewater systems, *Environmental science & technology*, 51, 2669-2675, 2017.

Quadros, M. E. and Marr, L. C.: Silver nanoparticles and total aerosols emitted by nanotechnology-related consumer spray products, *Environmental science & technology*, 45, 10713-10719, 2011.

von der Weiden, S. L., Drewnick, F., and Borrmann, S.: Particle Loss Calculator – a new software tool for the assessment of the performance of aerosol inlet systems, *Atmos. Meas. Tech.*, 2, 479-494, 10.5194/amt-2-479-2009, 2009.
